# Supplementary material for: Targeting HIF2α Translation with Tempol in VHL-Deficient Clear Cell Renal Cell Carcinoma
Source: PubMed Central journal article supplement (PMC3717806; doi:10.18632/oncotarget.561), 2012-11-08
Supplement: oncotarget-03-1472-s001.pdf [file oncotarget-03-1472-s001.pdf]

## Targeting HIF2 $\alpha$ Translation with Tempol in VHL-Deficient Clear Cell Renal Cell Carcinoma - Sourbier et al

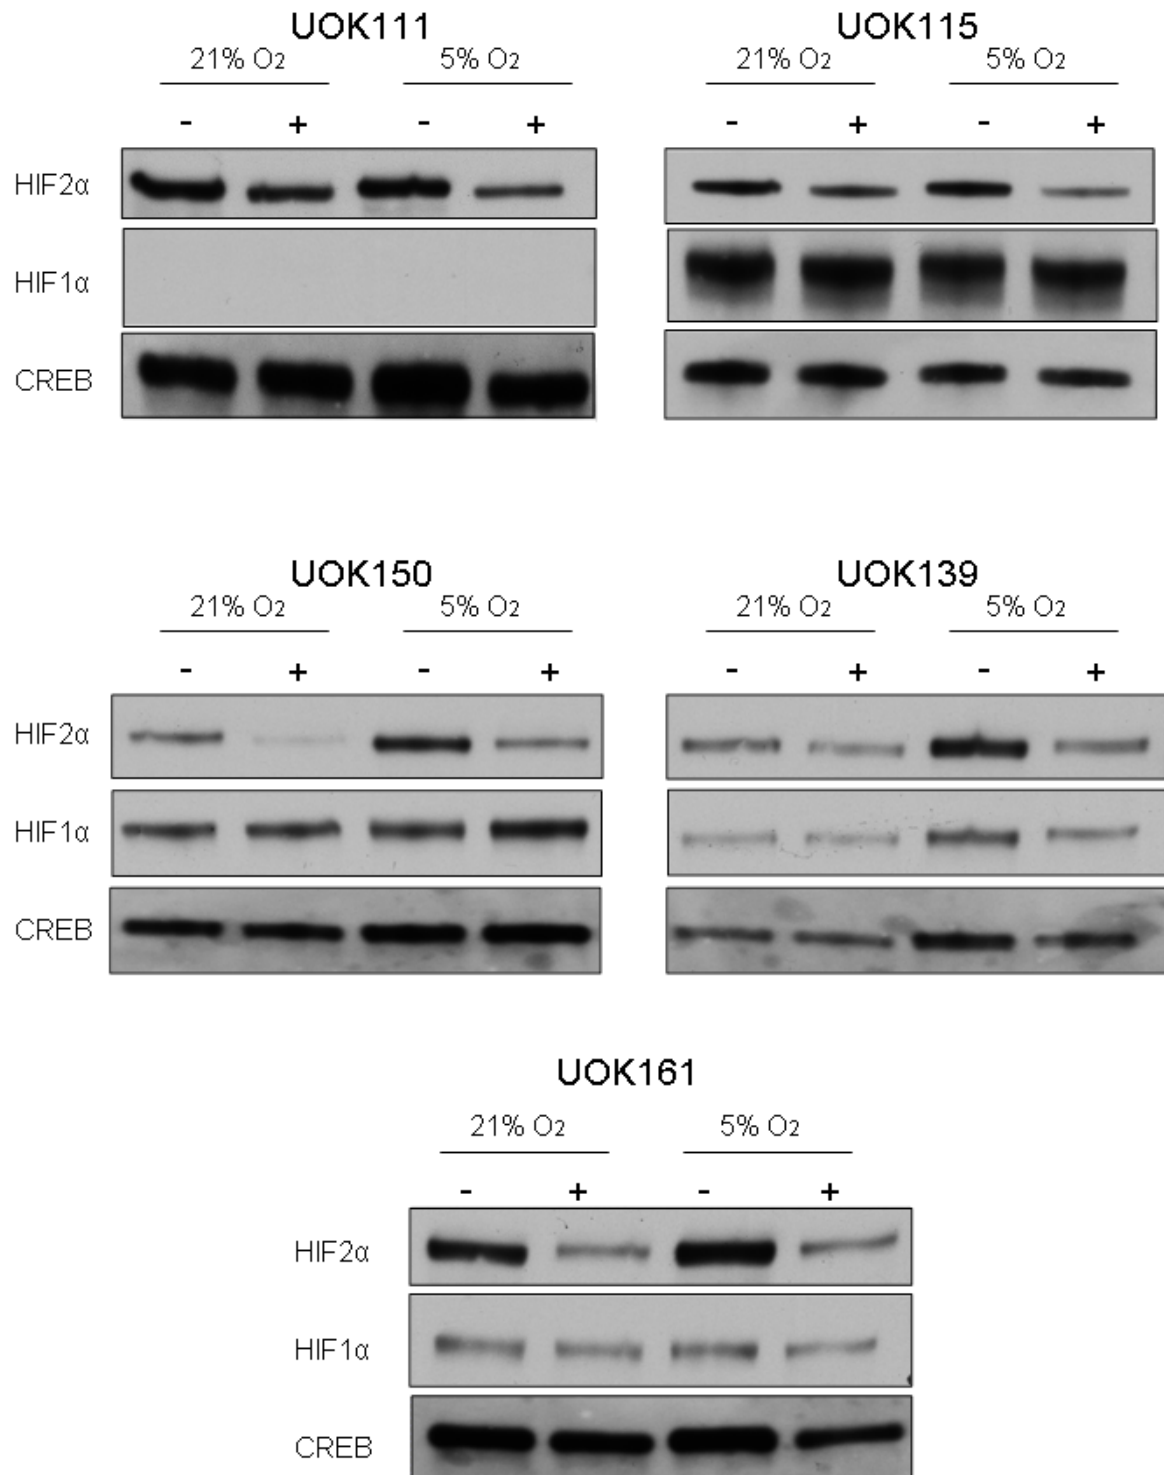

**Supplementary figure 1: Tempol decreased nuclear HIF2 in other CCRCC cells.** The effect of Tempol treatment (5mM, 24h) on the nuclear expression of HIF2 $\alpha$  in a panel of CCRCC cell lines was assessed by immunoblotting using 30 $\mu$ g of nuclear extracts.
